# Supplementary material
Source: Research Square preprint supplement (doi:10.21203/rs.3.rs-9428619/v1)
Supplement: Supplementary file 1 [file 333036453bfd11c798f176c1.xlsx]

## Sheet: Foglio1
Kingdom	Phylum	Class	Order	Family	Genus	Taxa	Group	Value	P.adj	Significance	mean_rel_ab	se_abund
Bacteria	Pseudomonadota	Gammaproteobacteria	Lysobacterales	Rhodanobacteraceae	Rhodanobacter	ASV_4	Unmulched control	4.3046	0.0191734	*	4.49383	1.96207
Bacteria	Pseudomonadota	Alphaproteobacteria	Sphingomonadales	Sphingomonadaceae	Sphingomonas	ASV_10	PP	4.16365	0.0184486	*	2.82338	1.4482
Bacteria	Pseudomonadota	Gammaproteobacteria	Lysobacterales	Rhodanobacteraceae	Rhodanobacter	ASV_5	Unmulched control	4.10483	0.0191734	*	2.57351	0.403071
Bacteria	Pseudomonadota	Gammaproteobacteria	Pseudomonadales	Cellvibrionaceae	Cellvibrio	ASV_36	PP	3.9354	0.0166229	*	1.92381	0.261399
Bacteria	Pseudomonadota	Alphaproteobacteria	Caulobacterales	Caulobacteraceae	Asticcacaulis	ASV_9	OxoPE	3.93285	0.0387765	*	2.14945	0.282235
Bacteria	Patescibacteria	Saccharimonadia	Saccharimonadales	Saccharimonadaceae	TM7a	ASV_22	PBAT	3.88415	0.02602	*	1.32159	0.0967527
Bacteria	Bacteroidota	Bacteroidia	Flavobacteriales	Weeksellaceae	Chryseobacterium	ASV_59	Unmulched control	3.84914	0.0310091	*	1.42867	0.534932
Bacteria	Pseudomonadota	Gammaproteobacteria	Lysobacterales	Rhodanobacteraceae	Rhodanobacter	ASV_24	Unmulched control	3.8283	0.0173513	*	1.55705	0.380128
Bacteria	Actinomycetota	Acidimicrobiia	Acidimicrobiales	Acidimicrobiaceae		ASV_6	PE	3.73532	0.0144037	*	1.59999	0.0885039
Bacteria	Pseudomonadota	Alphaproteobacteria	Hyphomicrobiales	Xanthobacteraceae		ASV_8	PE	3.73109	0.0146119	*	1.70058	0.0403542
Bacteria	Actinomycetota	Actinobacteria	Propionibacteriales	Nocardioidaceae	Nocardioides	ASV_41	Unmulched control	3.70989	0.0361675	*	1.1594	0.398861
Bacteria	Pseudomonadota	Alphaproteobacteria	Acetobacterales	Acetobacteraceae		ASV_14	PE	3.59056	0.0240631	*	1.35225	0.0751812
Bacteria	Verrucomicrobiota	Verrucomicrobiia	Pedosphaerales	Pedosphaeraceae		ASV_63	PE	3.58682	0.0146119	*	0.833933	0.103037
Bacteria	Actinomycetota	Acidimicrobiia	Acidimicrobiales	Acidimicrobiaceae		ASV_31	PE	3.58455	0.0202967	*	1.02624	0.195706
Bacteria	Pseudomonadota	Gammaproteobacteria	Lysobacterales	Rhodanobacteraceae	Rhodanobacter	ASV_49	PBAT	3.57162	0.0144037	*	0.836161	0.0379333
Bacteria	Pseudomonadota	Alphaproteobacteria	Caulobacterales	Caulobacteraceae	Brevundimonas	ASV_128	PBAT	3.54313	0.0337457	*	0.723888	0.288161
Bacteria	Bacteroidota	Bacteroidia	Sphingobacteriales	Sphingobacteriaceae	Mucilaginibacter	ASV_37	PE	3.53163	0.012474	*	0.837598	0.0900385
Bacteria	Acidobacteriota	Acidobacteriae	Solibacterales	Solibacteraceae	Candidatus Solibacter	ASV_35	PE	3.50521	0.0135992	*	0.985927	0.106426
Bacteria	Bacteroidota	Bacteroidia	Chitinophagales	Chitinophagaceae	Arachidicoccus	ASV_60	Unmulched control	3.50221	0.0221023	*	0.705132	0.193146
Bacteria	Pseudomonadota	Gammaproteobacteria	Burkholderiales	Burkholderiaceae	Burkholderia-Caballeronia-Paraburkholderia	ASV_19	PE	3.49755	0.0393195	*	1.06453	0.0546087
Bacteria	Pseudomonadota	Gammaproteobacteria	Lysobacterales	Rhodanobacteraceae	Rhodanobacter	ASV_13	PE	3.47601	0.0337278	*	0.872088	0.0533977
Bacteria	Pseudomonadota	Gammaproteobacteria	Burkholderiales	Burkholderiaceae		ASV_101	PE	3.47064	0.0154418	*	0.579854	0.0645823
Bacteria	Pseudomonadota	Alphaproteobacteria	Caulobacterales	Caulobacteraceae	Asticcacaulis	ASV_21	PP	3.46966	0.0189022	*	0.81147	0.188539
Bacteria	Bacteroidota	Bacteroidia	Chitinophagales	Chitinophagaceae		ASV_275	Unmulched control	3.46363	0.0164701	*	0.564288	0.136756
Bacteria	Pseudomonadota	Gammaproteobacteria	Burkholderiales	Oxalobacteraceae		ASV_15	PE	3.45693	0.0214838	*	0.612368	0.0872571
Bacteria	Bacteroidota	Bacteroidia	Chitinophagales	Chitinophagaceae		ASV_322	PBAT	3.4563	0.0337457	*	0.602698	0.299536
Bacteria	Verrucomicrobiota	Verrucomicrobiia	Pedosphaerales	Pedosphaeraceae		ASV_69	PE	3.45418	0.0232513	*	0.630576	0.0247761
Bacteria	Pseudomonadota	Gammaproteobacteria	Burkholderiales	Oxalobacteraceae	Duganella	ASV_95	PP	3.45333	0.0277112	*	0.530696	0.00475145
Bacteria	Pseudomonadota	Gammaproteobacteria	Lysobacterales	Rhodanobacteraceae	Rhodanobacter	ASV_57	Unmulched control	3.438	0.022738	*	0.630228	0.133447
Bacteria	Pseudomonadota	Gammaproteobacteria	Burkholderiales	Comamonadaceae	Rhodoferax	ASV_43	Unmulched control	3.43524	0.0254628	*	0.811673	0.055521
Bacteria	Planctomycetota	Phycisphaerae	Tepidisphaerales	CPla-3 termite group		ASV_166	Unmulched control	3.40679	0.0166229	*	0.514514	0.0929849
Bacteria	Pseudomonadota	Alphaproteobacteria	Micropepsales	Micropepsaceae		ASV_54	PE	3.40319	0.0111141	*	0.576512	0.0529671
Bacteria	Pseudomonadota	Gammaproteobacteria	Burkholderiales	Burkholderiaceae	Burkholderia-Caballeronia-Paraburkholderia	ASV_29	PE	3.39374	0.0247534	*	0.66442	0.0986794
Bacteria	Pseudomonadota	Gammaproteobacteria	Burkholderiales	Oxalobacteraceae		ASV_25	PE	3.38922	0.0241313	*	0.485174	0.0908576
Bacteria	Pseudomonadota	Alphaproteobacteria	Caulobacterales	Caulobacteraceae		ASV_79	Unmulched control	3.3768	0.0361675	*	0.509195	0.181926
Bacteria	Verrucomicrobiota	Verrucomicrobiia	Opitutales	Puniceicoccaceae		ASV_208	PE	3.34357	0.0116448	*	0.438544	0.0326392
Bacteria	Acidobacteriota	Acidobacteriae	Terriglobales			ASV_98	PE	3.33765	0.0169632	*	0.457198	0.0550282
Bacteria	Pseudomonadota	Alphaproteobacteria	Hyphomicrobiales	Devosiaceae	Devosia	ASV_102	Unmulched control	3.33269	0.0142659	*	0.427638	0.0591043
Bacteria	Pseudomonadota	Alphaproteobacteria	Micropepsales	Micropepsaceae		ASV_103	PE	3.30122	0.0121195	*	0.427472	0.0868232
Bacteria	Bacteroidota	Bacteroidia	Chitinophagales	Chitinophagaceae	Ferruginibacter	ASV_184	PBAT	3.28687	0.0356479	*	0.385092	0.170614
Bacteria	Pseudomonadota	Alphaproteobacteria	Hyphomicrobiales	Devosiaceae		ASV_104	Unmulched control	3.28376	0.0331456	*	0.399216	0.08541
Bacteria	Acidobacteriota	Acidobacteriae	Solibacterales	Solibacteraceae	Candidatus Solibacter	ASV_46	PE	3.2808	0.0221023	*	0.664432	0.0380757
Bacteria	Pseudomonadota	Alphaproteobacteria	Caulobacterales	Hyphomonadaceae	Hirschia	ASV_71	Unmulched control	3.27815	0.0240631	*	0.487229	0.0569674
Bacteria	Pseudomonadota	Alphaproteobacteria	Acetobacterales	Acetobacteraceae	Rhodovastum	ASV_107	Unmulched control	3.27491	0.0117749	*	0.500301	0.0461608
Bacteria	Acidobacteriota	Acidobacteriae	Terriglobales	Acidobacteriaceae (Subgroup 1)	Granulicella	ASV_86	PE	3.26855	0.015551	*	0.411277	0.0106791
Bacteria	Actinomycetota	Actinobacteria	Micrococcales	Microbacteriaceae		ASV_90	PBAT	3.26761	0.0317722	*	0.419039	0.0762708
Bacteria	Acidobacteriota	Acidobacteriae	Terriglobales	Acidobacteriaceae (Subgroup 1)	Granulicella	ASV_96	Unmulched control	3.26371	0.0258249	*	0.482138	0.0752085
Bacteria	Pseudomonadota	Gammaproteobacteria	Lysobacterales	Lysobacteraceae	Pseudoxanthomonas	ASV_92	Unmulched control	3.25943	0.030812	*	0.346154	0.151946
Bacteria	Myxococcota	Polyangiia	Haliangiales	Haliangiaceae		ASV_205	PE	3.25566	0.0235228	*	0.378796	0.0562901
Bacteria	Bacteroidota	Bacteroidia	Sphingobacteriales	Sphingobacteriaceae	Mucilaginibacter	ASV_91	PE	3.23845	0.0202967	*	0.446466	0.0330645
Bacteria	Pseudomonadota	Gammaproteobacteria	Burkholderiales	Oxalobacteraceae	Massilia	ASV_178	Unmulched control	3.23433	0.0165668	*	0.35698	0.129451
Bacteria	Bacteroidota	Bacteroidia	Sphingobacteriales	Sphingobacteriaceae	Mucilaginibacter	ASV_62	PP	3.22851	0.0258249	*	0.470763	0.108228
Bacteria	Pseudomonadota	Alphaproteobacteria	Micropepsales	Micropepsaceae		ASV_119	PE	3.22721	0.0166229	*	0.384277	0.0770801
Bacteria	Spirochaetota	Spirochaetia	Spirochaetales	Spirochaetaceae	Spirochaeta 2	ASV_259	Unmulched control	3.21951	0.0246153	*	0.342841	0.110612
Bacteria	Bacteroidota	Bacteroidia	Chitinophagales	Chitinophagaceae	Puia	ASV_93	PE	3.21349	0.0285024	*	0.481897	0.00741213
Bacteria	Pseudomonadota	Alphaproteobacteria	Caulobacterales	Caulobacteraceae	Caulobacter	ASV_186	PBAT	3.19345	0.0134479	*	0.264697	0.00542682
Bacteria	Pseudomonadota	Gammaproteobacteria	Lysobacterales	Rhodanobacteraceae	Dyella	ASV_284	Unmulched control	3.19263	0.0293396	*	0.323556	0.126107
Bacteria	Pseudomonadota	Gammaproteobacteria	Lysobacterales	Lysobacteraceae	Pseudoxanthomonas	ASV_398	OxoPE	3.18592	0.00797675	**	0.308904	0.0925372
Bacteria	Acidobacteriota	Acidobacteriae	Bryobacterales	Bryobacteraceae	Bryobacter	ASV_40	PE	3.18246	0.0254628	*	0.532835	0.0300479
Bacteria	Pseudomonadota	Alphaproteobacteria	Hyphomicrobiales	Devosiaceae		ASV_109	OxoPE	3.17918	0.0313069	*	0.408252	0.0550944
Bacteria	Myxococcota	Polyangiia	Polyangiales	BIrii41		ASV_198	PP	3.1712	0.0270031	*	0.320187	0.028616
Bacteria	Pseudomonadota	Alphaproteobacteria	Micropepsales	Micropepsaceae		ASV_111	PE	3.16888	0.0195844	*	0.340472	0.0511588
Bacteria	Bacteroidota	Bacteroidia	Flavobacteriales	Flavobacteriaceae	Flavobacterium	ASV_478	Unmulched control	3.16721	0.00945306	**	0.277118	0.104274
Bacteria	Pseudomonadota	Gammaproteobacteria	Burkholderiales	Burkholderiaceae	Burkholderia-Caballeronia-Paraburkholderia	ASV_149	PE	3.16611	0.0150686	*	0.290717	0.0378328
Bacteria	Planctomycetota	Phycisphaerae	Tepidisphaerales	CPla-3 termite group		ASV_218	PE	3.16526	0.0162348	*	0.309542	0.00281814
Bacteria	Acidobacteriota	Acidobacteriae	Terriglobales	Acidobacteriaceae (Subgroup 1)	Occallatibacter	ASV_159	PE	3.16156	0.0128386	*	0.336502	0.0445528
Bacteria	Bacteroidota	Bacteroidia	Chitinophagales	Chitinophagaceae		ASV_148	Unmulched control	3.1587	0.0424127	*	0.291148	0.0364317
Bacteria	Pseudomonadota	Alphaproteobacteria	Hyphomicrobiales			ASV_195	Unmulched control	3.15785	0.0148231	*	0.305725	0.0563194
Bacteria	Acidobacteriota	Acidobacteriae	Terriglobales	Acidobacteriaceae (Subgroup 1)	Granulicella	ASV_121	PE	3.15722	0.0219606	*	0.290429	0.0329989
Bacteria	Bacteroidota	Bacteroidia	Chitinophagales	Chitinophagaceae		ASV_512	Unmulched control	3.15625	0.0481006	*	0.27803	0.0732929
Bacteria	Bacteroidota	Bacteroidia	Chitinophagales	Chitinophagaceae	Puia	ASV_113	PE	3.15357	0.0148231	*	0.422036	0.0364129
Bacteria	Verrucomicrobiota	Verrucomicrobiia	Pedosphaerales	Pedosphaeraceae		ASV_191	PP	3.15243	0.02837	*	0.32306	0.06638
Bacteria	Patescibacteria	Saccharimonadia	Saccharimonadales	LWQ8		ASV_120	PE	3.14386	0.0222766	*	0.301071	0.0433359
Bacteria	Pseudomonadota	Alphaproteobacteria	Hyphomicrobiales	Rhizobiaceae		ASV_368	PBAT	3.13618	0.020952	*	0.267804	0.026575
Bacteria	Acidobacteriota	Acidobacteriae	Terriglobales	Acidobacteriaceae (Subgroup 1)	Occallatibacter	ASV_318	PE	3.12972	0.0196961	*	0.261044	0.0943994
Bacteria	Actinomycetota	Actinobacteria	Micrococcales	Microbacteriaceae		ASV_264	PBAT	3.12857	0.0463166	*	0.257432	0.0158164
Bacteria	Acidobacteriota	Acidobacteriae	Terriglobales	Acidobacteriaceae (Subgroup 1)	Granulicella	ASV_50	PE	3.12598	0.0202967	*	0.380645	0.0533508
Bacteria	Pseudomonadota	Gammaproteobacteria	Lysobacterales	Lysobacteraceae	Pseudoxanthomonas	ASV_237	Unmulched control	3.12512	0.0302355	*	0.25457	0.088369
Bacteria	Patescibacteria	Parcubacteria	Candidatus Kaiserbacteria			ASV_163	Unmulched control	3.12458	0.0409929	*	0.324308	0.0440959
Bacteria	Bacteroidota	Bacteroidia	Chitinophagales	Chitinophagaceae	Heliimonas	ASV_390	PE	3.11635	0.0109125	*	0.255646	0.0557339
Bacteria	Actinomycetota	Acidimicrobiia	Acidimicrobiales	Acidimicrobiaceae	Acidiferrimicrobium	ASV_161	PE	3.11293	0.0253261	*	0.323356	0.0036018
Bacteria	Pseudomonadota	Gammaproteobacteria	Burkholderiales	Oxalobacteraceae	Duganella	ASV_244	PP	3.10613	0.0253261	*	0.263677	0.0281527
Bacteria	Bacteroidota	Bacteroidia	Sphingobacteriales	Sphingobacteriaceae	Mucilaginibacter	ASV_202	PP	3.10265	0.0293154	*	0.293964	0.0789361
Bacteria	Verrucomicrobiota	Verrucomicrobiia	Opitutales	Puniceicoccaceae		ASV_311	PE	3.10134	0.0168802	*	0.243603	0.0400799
Bacteria	Chloroflexota	Ktedonobacteria	Ktedonobacterales	Ktedonobacteraceae		ASV_387	PE	3.1005	0.014768	*	0.247657	0.0599068
Bacteria	Pseudomonadota	Alphaproteobacteria	Micropepsales	Micropepsaceae		ASV_89	PE	3.0939	0.0186346	*	0.319444	0.0157202
Bacteria	Bacteroidota	Bacteroidia	Sphingobacteriales	Sphingobacteriaceae	Albibacterium	ASV_400	PBAT	3.09309	0.0184326	*	0.253887	0.10348
Bacteria	Bacteroidota	Bacteroidia	Sphingobacteriales	Sphingobacteriaceae	Mucilaginibacter	ASV_155	PE	3.09247	0.0246153	*	0.253146	0.0608953
Bacteria	Candidatus Eremiobacterota	Eremiobacteria				ASV_61	PE	3.0912	0.0202967	*	0.410818	0.00661641
Bacteria	Verrucomicrobiota	Verrucomicrobiia	Opitutales	Opitutaceae	Opitutus	ASV_236	PP	3.091	0.0313267	*	0.247429	0.0337717
Bacteria	Pseudomonadota	Alphaproteobacteria	Sphingomonadales	Sphingomonadaceae	Sphingopyxis	ASV_133	Unmulched control	3.07819	0.0195844	*	0.233389	0.0401893
Bacteria	Pseudomonadota	Alphaproteobacteria	Caulobacterales	Caulobacteraceae	Caulobacter	ASV_153	Unmulched control	3.07416	0.0300261	*	0.229441	0.0529461
Bacteria	Pseudomonadota	Alphaproteobacteria	Micropepsales	Micropepsaceae		ASV_74	PE	3.06474	0.0144037	*	0.292422	0.0201109
Bacteria	Acidobacteriota	Acidobacteriae	Solibacterales	Solibacteraceae	Candidatus Solibacter	ASV_429	PE	3.06049	0.020952	*	0.22066	0.00650887
Bacteria	Pseudomonadota	Alphaproteobacteria	Caulobacterales	Caulobacteraceae	Caulobacter	ASV_85	Unmulched control	3.05495	0.0387765	*	0.283186	0.0511139
Bacteria	Acidobacteriota	Acidobacteriae	Terriglobales	Acidobacteriaceae (Subgroup 1)	Granulicella	ASV_333	PE	3.0549	0.013405	*	0.221927	0.00604276
Bacteria	Pseudomonadota	Alphaproteobacteria	Micropepsales	Micropepsaceae		ASV_76	Unmulched control	3.04836	0.022738	*	0.402566	0.0708473
Bacteria	Bacteroidota	Bacteroidia	Chitinophagales	Chitinophagaceae	Agriterribacter	ASV_408	PBAT	3.04675	0.0337457	*	0.220849	0.027427
Bacteria	Pseudomonadota	Gammaproteobacteria	Burkholderiales	Nitrosomonadaceae	Nitrosospira	ASV_373	Unmulched control	3.04545	0.0405131	*	0.207838	0.107895
Bacteria	Acidobacteriota	Acidobacteriae	Solibacterales	Solibacteraceae	Candidatus Solibacter	ASV_520	PP	3.04541	0.0274143	*	0.219225	0.0649466
Bacteria	Pseudomonadota	Alphaproteobacteria	Hyphomicrobiales	Devosiaceae	Youhaiella	ASV_421	PBAT	3.04369	0.0330904	*	0.210788	0.0712214
Bacteria	Bacteroidota	Bacteroidia	Flavobacteriales	Weeksellaceae	Chryseobacterium	ASV_235	PBAT	3.04024	0.0302664	*	0.200561	0.00875629
Bacteria	Pseudomonadota	Alphaproteobacteria	Hyphomicrobiales	Xanthobacteraceae	Rhodopseudomonas	ASV_211	Unmulched control	3.03986	0.025974	*	0.223528	0.00611201
Bacteria	Acidobacteriota	Acidobacteriae	Terriglobales	Acidobacteriaceae (Subgroup 1)	Granulicella	ASV_18	PE	3.02622	0.0356663	*	0.622789	0.0208775
Bacteria	Pseudomonadota	Alphaproteobacteria	Hyphomicrobiales	Rhizobiaceae	Rhizobium	ASV_399	Unmulched control	3.01892	0.0302664	*	0.204438	0.0679634
Bacteria	Bacteroidota	Bacteroidia	Chitinophagales	Chitinophagaceae	Taibaiella	ASV_344	PE	3.01738	0.0418181	*	0.18878	0.0393603
Bacteria	Pseudomonadota	Alphaproteobacteria	Caulobacterales	Caulobacteraceae		ASV_222	PE	3.01722	0.02001	*	0.180087	0.0138313
Bacteria	Bacteroidota	Bacteroidia	Sphingobacteriales	Sphingobacteriaceae	Pedobacter	ASV_623	Unmulched control	3.01638	0.0184326	*	0.198154	0.0439618
Bacteria	Pseudomonadota	Gammaproteobacteria	Burkholderiales	Oxalobacteraceae	Undibacterium	ASV_53	PE	3.01264	0.0208983	*	0.201868	0.0104567
Bacteria	Acidobacteriota	Acidobacteriae	Terriglobales	Acidobacteriaceae (Subgroup 1)		ASV_100	PE	3.01164	0.0298367	*	0.228529	0.035698
Bacteria	Pseudomonadota	Gammaproteobacteria	Lysobacterales	Lysobacteraceae	Thermomonas	ASV_434	PBAT	3.0107	0.0206525	*	0.204243	0.0767309
Bacteria	Pseudomonadota	Alphaproteobacteria	Micropepsales	Micropepsaceae		ASV_273	PP	3.00905	0.0278415	*	0.204841	0.0347849
Bacteria	Verrucomicrobiota	Verrucomicrobiia	Opitutales	Opitutaceae		ASV_541	PE	3.00864	0.0274598	*	0.201463	0.0268629
Bacteria	Pseudomonadota	Alphaproteobacteria	Sphingomonadales	Sphingomonadaceae	Sphingobium	ASV_727	PBAT	3.00374	0.0184326	*	0.118796	0.00340604
Bacteria	Acidobacteriota	Acidobacteriae	Terriglobales	Acidobacteriaceae (Subgroup 1)	Occallatibacter	ASV_336	PE	3.00272	0.015524	*	0.182399	0.0110441
Bacteria	Patescibacteria	Parcubacteria				ASV_359	PE	3.0016	0.0156979	*	0.224403	0.0193445
Bacteria	Bacteroidota	Bacteroidia	Sphingobacteriales	Sphingobacteriaceae	Mucilaginibacter	ASV_249	PE	3.00037	0.0463869	*	0.225682	0.0460558
Bacteria	Bacteroidota	Bacteroidia	Sphingobacteriales	Sphingobacteriaceae	Pedobacter	ASV_488	PBAT	2.99996	0.0274143	*	0.194349	0.0534828
Bacteria	Pseudomonadota	Gammaproteobacteria	WD260			ASV_80	PP	2.9874	0.0247534	*	0.341105	0.0239725
Bacteria	Pseudomonadota	Alphaproteobacteria	Hyphomicrobiales	Xanthobacteraceae		ASV_124	PE	2.98601	0.025248	*	0.186425	0.0153948
Bacteria	Acidobacteriota	Acidobacteriae	Bryobacterales	Bryobacteraceae	Bryobacter	ASV_139	OxoPE	2.98077	0.0232513	*	0.235728	0.0233729
Bacteria	Acidobacteriota	Acidobacteriae	Solibacterales	Solibacteraceae	Candidatus Solibacter	ASV_406	PE	2.97514	0.011082	*	0.188993	0.027509
Bacteria	Patescibacteria	Saccharimonadia	Saccharimonadales			ASV_122	PE	2.97461	0.0230625	*	0.259379	0.033262
Bacteria	Bacteroidota	Bacteroidia	Sphingobacteriales	env.OPS 17		ASV_286	PP	2.97185	0.0451135	*	0.217352	0.0757474
Bacteria	Pseudomonadota	Alphaproteobacteria	Hyphomicrobiales	Rhizobiaceae	Aquamicrobium	ASV_388	PBAT	2.97175	0.00797675	**	0.186197	0.0513175
Bacteria	Acidobacteriota	Acidobacteriae	Terriglobales	Acidobacteriaceae (Subgroup 1)	Occallatibacter	ASV_289	PE	2.96316	0.0255742	*	0.182612	0.0254501
Bacteria	Pseudomonadota	Gammaproteobacteria	Burkholderiales	Alcaligenaceae	Candidimonas	ASV_482	PBAT	2.95545	0.0463166	*	0.185303	0.0613791
Bacteria	Planctomycetota	Phycisphaerae	Tepidisphaerales	CPla-3 termite group		ASV_173	PE	2.95521	0.0297302	*	0.300798	0.0513937
Bacteria	Verrucomicrobiota	Verrucomicrobiia	Pedosphaerales	Pedosphaeraceae		ASV_193	PE	2.95394	0.0285024	*	0.202448	0.0209926
Bacteria	Acidobacteriota	Acidobacteriae	Terriglobales	Acidobacteriaceae (Subgroup 1)		ASV_87	PE	2.95273	0.034684	*	0.328509	0.02025
Bacteria	Pseudomonadota	Alphaproteobacteria	Rhodospirillales	Magnetospirillaceae		ASV_535	PE	2.9522	0.0171541	*	0.177787	0.0265511
Bacteria	Pseudomonadota	Gammaproteobacteria	Lysobacterales	Lysobacteraceae	Arenimonas	ASV_471	OxoPE	2.94947	0.0154877	*	0.177708	0.0588944
Bacteria	Bacteroidota	Bacteroidia	Cytophagales	Microscillaceae		ASV_552	PP	2.9468	0.0171541	*	0.178829	0.0386898
Bacteria	Bacteroidota	Bacteroidia	Chitinophagales	Chitinophagaceae	Arachidicoccus	ASV_142	PP	2.94647	0.00797675	**	0.167551	0.0677383
Bacteria	Verrucomicrobiota	Verrucomicrobiia	Methylacidiphilales	Methylacidiphilaceae		ASV_216	PE	2.9459	0.0186346	*	0.245971	0.0320113
Bacteria	Verrucomicrobiota	Verrucomicrobiia	Methylacidiphilales	Methylacidiphilaceae		ASV_233	PE	2.94405	0.0387447	*	0.172776	0.0158688
Bacteria	Bacteroidota	Bacteroidia	Sphingobacteriales	Sphingobacteriaceae	Mucilaginibacter	ASV_331	PP	2.94226	0.0416918	*	0.201556	0.069527
Bacteria	Bacteroidota	Bacteroidia	Chitinophagales	Chitinophagaceae	Agriterribacter	ASV_548	Unmulched control	2.94003	0.0261779	*	0.160513	0.0628318
Bacteria	Actinomycetota	Actinobacteria	Micrococcales	Intrasporangiaceae	Terrabacter	ASV_606	Unmulched control	2.92961	0.0173513	*	0.143428	0.00189705
Bacteria	Bacteroidota	Bacteroidia	Sphingobacteriales	Sphingobacteriaceae	Mucilaginibacter	ASV_597	PP	2.92181	0.0282674	*	0.153407	0.049398
Bacteria	Planctomycetota	Phycisphaerae	Tepidisphaerales	WD2101 soil group		ASV_367	PE	2.92073	0.0361675	*	0.187032	0.0164672
Bacteria	Pseudomonadota	Gammaproteobacteria	Burkholderiales	Burkholderiaceae	Burkholderia-Caballeronia-Paraburkholderia	ASV_58	PE	2.91927	0.0293154	*	0.361797	0.0398353
Bacteria	Myxococcota	Myxococcia	Myxococcales	Myxococcaceae		ASV_250	PE	2.91884	0.0186346	*	0.232222	0.0221946
Bacteria	Acidobacteriota	Acidobacteriae	Terriglobales	Acidobacteriaceae (Subgroup 1)	Occallatibacter	ASV_474	PE	2.91431	0.0391982	*	0.156323	0.0171322
Bacteria	Pseudomonadota	Alphaproteobacteria	Sphingomonadales	Sphingomonadaceae	Sphingobium	ASV_332	Unmulched control	2.89314	0.0392401	*	0.150614	0.0444066
Bacteria	Pseudomonadota	Gammaproteobacteria	WD260			ASV_248	PP	2.88741	0.036066	*	0.177381	0.029423
Bacteria	Pseudomonadota	Alphaproteobacteria	Rhodospirillales			ASV_464	PE	2.88486	0.0141096	*	0.150416	0.00298555
Bacteria	Pseudomonadota	Gammaproteobacteria	Lysobacterales	Rhodanobacteraceae	Dokdonella	ASV_592	PBAT	2.88459	0.0337457	*	0.14219	0.0244365
Bacteria	Myxococcota	Polyangiia	Polyangiales	Polyangiaceae		ASV_525	OxoPE	2.87908	0.0241769	*	0.151424	0.0353658
Bacteria	Pseudomonadota	Alphaproteobacteria	Acetobacterales	Acetobacteraceae		ASV_317	PE	2.87126	0.0127132	*	0.151027	0.0399442
Bacteria	Pseudomonadota	Alphaproteobacteria	Rhodospirillales	Magnetospirillaceae		ASV_655	PE	2.86458	0.0301038	*	0.144362	0.0143951
Bacteria	Acidobacteriota	Acidobacteriae	Subgroup 2			ASV_307	PE	2.86365	0.0239239	*	0.159519	0.00182107
Bacteria	Bacteroidota	Bacteroidia	Sphingobacteriales	Sphingobacteriaceae	Mucilaginibacter	ASV_555	PE	2.86232	0.0212037	*	0.146017	0.0272453
Bacteria	Planctomycetota	Phycisphaerae	Tepidisphaerales	WD2101 soil group		ASV_258	PE	2.86186	0.0316385	*	0.162541	0.00231148
Bacteria	Bacteroidota	Bacteroidia	Sphingobacteriales	Sphingobacteriaceae	Mucilaginibacter	ASV_174	PE	2.8609	0.0378201	*	0.177575	0.052925
Bacteria	Bacteroidota	Bacteroidia	Chitinophagales	Chitinophagaceae	Puia	ASV_393	Unmulched control	2.85905	0.0143174	*	0.124928	0.0098401
Bacteria	Verrucomicrobiota	Verrucomicrobiia	Pedosphaerales	Pedosphaeraceae		ASV_544	PE	2.85858	0.033156	*	0.148727	0.023792
Bacteria	Pseudomonadota	Gammaproteobacteria	Lysobacterales	Lysobacteraceae	Luteimonas	ASV_812	PBAT	2.85389	0.00797675	**	0.135985	0.0277258
Bacteria	Planctomycetota	Planctomycetes	Planctomycetales	Rubinisphaeraceae	Planctomicrobium	ASV_409	PBAT	2.85312	0.0337457	*	0.137	0.0403613
Bacteria	Pseudomonadota	Alphaproteobacteria	Hyphomicrobiales	Xanthobacteraceae		ASV_238	OxoPE	2.85266	0.0321986	*	0.186293	0.00760836
Bacteria	Planctomycetota	Phycisphaerae	Tepidisphaerales	WD2101 soil group		ASV_479	PE	2.84869	0.0154418	*	0.125515	0.0107611
Bacteria	Pseudomonadota	Alphaproteobacteria	Acetobacterales	Acetobacteraceae		ASV_364	PE	2.84797	0.0227088	*	0.158017	0.031719
Bacteria	Acidobacteriota	Acidobacteriae	Terriglobales			ASV_428	PE	2.84753	0.0171808	*	0.135154	0.0198473
Bacteria	Acidobacteriota	Acidobacteriae	Terriglobales	Acidobacteriaceae (Subgroup 1)	Granulicella	ASV_330	Unmulched control	2.84587	0.024849	*	0.134771	0.0385844
Bacteria	Pseudomonadota	Alphaproteobacteria	Caulobacterales	Caulobacteraceae	Asticcacaulis	ASV_272	OxoPE	2.84418	0.0467437	*	0.164295	0.0250182
Bacteria	Verrucomicrobiota	Verrucomicrobiia	Methylacidiphilales	Methylacidiphilaceae		ASV_366	PP	2.84159	0.0405944	*	0.135879	0.031515
Bacteria	Pseudomonadota	Alphaproteobacteria	Hyphomicrobiales	Rhizobiaceae	Aminobacter	ASV_468	PBAT	2.83586	0.0164701	*	0.117902	0.0123957
Bacteria	Bacteroidota	Bacteroidia	Chitinophagales	Chitinophagaceae		ASV_648	PE	2.83389	0.0181969	*	0.134362	0.020273
Bacteria	Pseudomonadota	Alphaproteobacteria	Micropepsales	Micropepsaceae		ASV_489	PE	2.83342	0.0168482	*	0.131613	0.051439
Bacteria	Pseudomonadota	Gammaproteobacteria	Burkholderiales	Comamonadaceae		ASV_78	PE	2.83214	0.0326816	*	0.145913	0.029246
Bacteria	Planctomycetota	Phycisphaerae	Tepidisphaerales	WD2101 soil group		ASV_228	PE	2.82774	0.0194484	*	0.203666	0.0180625
Bacteria	Bacteroidota	Bacteroidia	Cytophagales	Microscillaceae		ASV_323	PP	2.82476	0.0411163	*	0.150849	0.025439
Bacteria	Pseudomonadota	Gammaproteobacteria			Acidibacter	ASV_242	PE	2.82436	0.0320858	*	0.149946	0.0156509
Bacteria	Bacteroidota	Bacteroidia	Chitinophagales			ASV_832	PBAT	2.82113	0.0481006	*	0.110493	0.0412466
Bacteria	Pseudomonadota	Gammaproteobacteria	Burkholderiales	Comamonadaceae		ASV_360	PE	2.81654	0.0381488	*	0.15017	0.0220521
Bacteria	Verrucomicrobiota	Verrucomicrobiia	Verrucomicrobiales	Verrucomicrobiaceae	Prosthecobacter	ASV_919	OxoPE	2.81468	0.0212037	*	0.127864	0.0167876
Bacteria	Pseudomonadota	Gammaproteobacteria	Burkholderiales	Comamonadaceae		ASV_533	PE	2.81162	0.0405944	*	0.128995	0.015159
Bacteria	Acidobacteriota	Acidobacteriae	Terriglobales	Acidobacteriaceae (Subgroup 1)	Granulicella	ASV_99	PE	2.81072	0.032797	*	0.209321	0.0105706
Bacteria	Bacteroidota	Bacteroidia	Flavobacteriales	Flavobacteriaceae	Flavobacterium	ASV_1222	Unmulched control	2.80566	0.0184326	*	0.110113	0.0437636
Bacteria	Myxococcota	Polyangiia	Haliangiales	Haliangiaceae		ASV_1995	PE	2.80294	0.00797675	**	0.0608341	0.000496642
Bacteria	Pseudomonadota	Gammaproteobacteria	Lysobacterales	Rhodanobacteraceae	Dokdonella	ASV_1089	PBAT	2.79601	0.00797675	**	0.105318	0.0118619
Bacteria	Pseudomonadota	Alphaproteobacteria	Acetobacterales	Acetobacteraceae	Rhodovastum	ASV_912	PBAT	2.79274	0.0337457	*	0.0943487	0.0163895
Bacteria	Bacteroidota	Bacteroidia	Chitinophagales	Chitinophagaceae		ASV_861	Unmulched control	2.79004	0.0164701	*	0.116068	0.0227725
Bacteria	Pseudomonadota	Alphaproteobacteria	Rhodospirillales			ASV_651	PP	2.78781	0.0161454	*	0.120025	0.023688
Bacteria	Acidobacteriota	Acidobacteriae	Terriglobales	Acidobacteriaceae (Subgroup 1)	Granulicella	ASV_245	PE	2.78225	0.0409412	*	0.124511	0.032005
Bacteria	Patescibacteria	Parcubacteria	Candidatus Kaiserbacteria			ASV_444	PE	2.77628	0.0340928	*	0.132673	0.0187062
Bacteria	Pseudomonadota	Alphaproteobacteria	Micropepsales	Micropepsaceae		ASV_320	PE	2.76821	0.0444016	*	0.132143	0.00254127
Bacteria	Pseudomonadota	Gammaproteobacteria	Burkholderiales	Gallionellaceae		ASV_667	PE	2.76803	0.0230625	*	0.10963	0.0108344
Bacteria	Pseudomonadota	Alphaproteobacteria	Rhodospirillales	Magnetospirillaceae		ASV_789	PE	2.76153	0.0230625	*	0.116297	0.0184285
Bacteria	Bacteroidota	Bacteroidia	Sphingobacteriales	Sphingobacteriaceae	Pedobacter	ASV_1226	PBAT	2.76047	0.00797675	**	0.0869471	0.0037442
Bacteria	Deinococcota	Deinococci	Deinococcales	Trueperaceae	Truepera	ASV_978	PBAT	2.76037	0.0261779	*	0.114197	0.0544275
Bacteria	Pseudomonadota	Gammaproteobacteria	Pseudomonadales	Cellvibrionaceae	Cellvibrio	ASV_824	Unmulched control	2.76024	0.0274143	*	0.104255	0.024058
Bacteria	Acidobacteriota	Acidobacteriae	Terriglobales	Acidobacteriaceae (Subgroup 1)	Terracidiphilus	ASV_452	PE	2.75943	0.0384851	*	0.124717	0.0221633
Bacteria	Pseudomonadota	Gammaproteobacteria	Pseudomonadales	Cellvibrionaceae	Cellvibrio	ASV_596	PP	2.75747	0.0479725	*	0.11371	0.0402162
Bacteria	Bacteroidota	Bacteroidia	Flavobacteriales	Flavobacteriaceae	Flavobacterium	ASV_989	Unmulched control	2.75663	0.020952	*	0.108554	0.0414263
Bacteria	Pseudomonadota	Gammaproteobacteria	Pseudomonadales	Moraxellaceae	Cavicella	ASV_945	Unmulched control	2.75526	0.0184326	*	0.103345	0.0192011
Bacteria	Pseudomonadota	Alphaproteobacteria	Caulobacterales	Caulobacteraceae	Caulobacter	ASV_496	PBAT	2.75498	0.0274598	*	0.0986517	0.00706667
Bacteria	Bacteroidota	Bacteroidia	Chitinophagales	Chitinophagaceae	Puia	ASV_1061	PE	2.74749	0.035284	*	0.0751023	0.0381183
Bacteria	Pseudomonadota	Alphaproteobacteria	Sphingomonadales	Sphingomonadaceae	Croceibacterium	ASV_549	PBAT	2.74746	0.026564	*	0.0937653	0.0123592
Bacteria	Planctomycetota	Phycisphaerae	Tepidisphaerales	WD2101 soil group		ASV_1503	Unmulched control	2.74617	0.0184326	*	0.0912254	0.0107375
Bacteria	Acidobacteriota	Acidobacteriae	Terriglobales	Acidobacteriaceae (Subgroup 1)	Granulicella	ASV_253	PE	2.74387	0.0208228	*	0.123291	0.0120859
Bacteria	Bacteroidota	Bacteroidia	Chitinophagales	Chitinophagaceae	Nemorincola	ASV_498	PE	2.73887	0.0114204	*	0.110304	0.0333283
Bacteria	Verrucomicrobiota	Verrucomicrobiia	Opitutales	Opitutaceae	Cephaloticoccus	ASV_353	Unmulched control	2.73665	0.0186346	*	0.137613	0.0278109
Bacteria	Planctomycetota	Phycisphaerae	Tepidisphaerales	WD2101 soil group		ASV_363	PE	2.73595	0.0326816	*	0.119964	0.0229595
Bacteria	Pseudomonadota	Gammaproteobacteria	Burkholderiales	Burkholderiaceae		ASV_435	PE	2.73445	0.0184326	*	0.1038	0.0170151
Bacteria	Pseudomonadota	Gammaproteobacteria	Burkholderiales	Burkholderiaceae		ASV_412	OxoPE	2.7325	0.0261779	*	0.106366	0.0190402
Bacteria	Acidobacteriota	Acidobacteriae	Terriglobales	Acidobacteriaceae (Subgroup 1)	Granulicella	ASV_192	PE	2.72997	0.0357653	*	0.130149	0.00901268
Bacteria	Bacteroidota	Bacteroidia	Chitinophagales	Chitinophagaceae		ASV_1268	PBAT	2.72499	0.00797675	**	0.0771744	0.00824152
Bacteria	Pseudomonadota	Alphaproteobacteria	Caulobacterales	Caulobacteraceae	Brevundimonas	ASV_698	PBAT	2.72348	0.035284	*	0.0953941	0.0224958
Bacteria	Verrucomicrobiota	Verrucomicrobiia	Opitutales	Opitutaceae	Oleiharenicola	ASV_514	OxoPE	2.71582	0.0192281	*	0.102433	0.0441171
Bacteria	Actinomycetota	Acidimicrobiia	Acidimicrobiales	Acidimicrobiaceae		ASV_413	PE	2.71575	0.0286662	*	0.112717	0.0119137
Bacteria	Bacteroidota	Bacteroidia	Sphingobacteriales	Sphingobacteriaceae	Mucilaginibacter	ASV_665	PE	2.71163	0.0261779	*	0.102352	0.0246165
Bacteria	Pseudomonadota	Alphaproteobacteria	Acetobacterales	Acetobacteraceae		ASV_669	PE	2.71138	0.0412616	*	0.101581	0.0125398
Bacteria	Bacteroidota	Bacteroidia	Sphingobacteriales	Sphingobacteriaceae	Mucilaginibacter	ASV_457	PE	2.71078	0.0187461	*	0.098751	0.00988144
Bacteria	Planctomycetota	Planctomycetes	Planctomycetales			ASV_328	PE	2.71038	0.0371902	*	0.15129	0.0199843
Bacteria	Verrucomicrobiota	Verrucomicrobiia	Methylacidiphilales	Methylacidiphilaceae		ASV_461	PE	2.70645	0.0337457	*	0.0944448	0.0101702
Bacteria	Pseudomonadota	Gammaproteobacteria	Burkholderiales	Burkholderiaceae	Burkholderia-Caballeronia-Paraburkholderia	ASV_201	OxoPE	2.70533	0.0382406	*	0.118251	0.00916297
Bacteria	Bacteroidota	Bacteroidia	Sphingobacteriales	env.OPS 17		ASV_903	PE	2.70477	0.0493379	*	0.0960843	0.0100709
Bacteria	Spirochaetota	Spirochaetia	Spirochaetales	Spirochaetaceae	Spirochaeta 2	ASV_1264	PE	2.70432	0.0330904	*	0.0996903	0.0211863
Bacteria	Actinomycetota	Thermoleophilia	Solirubrobacterales	Solirubrobacteraceae		ASV_513	PE	2.70277	0.0387447	*	0.0938821	0.0191298
Bacteria	Bacillota	Bacilli	Bacillales	Planococcaceae	Psychrobacillus	ASV_395	PBAT	2.69663	0.0451901	*	0.106644	0.0163669
Bacteria	Myxococcota	Polyangiia	Polyangiales	BIrii41		ASV_527	PE	2.69176	0.00797675	**	0.0946961	0.0144607
Bacteria	Bacteroidota	Bacteroidia	Sphingobacteriales	Sphingobacteriaceae	Mucilaginibacter	ASV_1269	PP	2.68958	0.0184326	*	0.0878138	0.0176166
Bacteria	Verrucomicrobiota	Verrucomicrobiia	Chthoniobacterales	Chthoniobacteraceae	Chthoniobacter	ASV_1127	OxoPE	2.68814	0.00797675	**	0.0769817	0.00433721
Bacteria	Verrucomicrobiota	Verrucomicrobiia	Pedosphaerales	Pedosphaeraceae		ASV_790	PE	2.68793	0.0398084	*	0.0882103	0.00127718
Bacteria	Pseudomonadota	Alphaproteobacteria	Hyphomicrobiales	Xanthobacteraceae	Pseudolabrys	ASV_1107	PP	2.68251	0.0184326	*	0.0959651	0.0186043
Bacteria	Bacteroidota	Bacteroidia	Sphingobacteriales	Sphingobacteriaceae	Mucilaginibacter	ASV_1096	PE	2.68185	0.0310146	*	0.0927778	0.0230258
Bacteria	Pseudomonadota	Gammaproteobacteria	Rickettsiellales	Rickettsiellaceae	Aquicella	ASV_706	PBAT	2.67875	0.0337457	*	0.0862122	0.0179843
Bacteria	Bacteroidota	Bacteroidia	Sphingobacteriales	CWT CU03-E12		ASV_565	PE	2.67419	0.015524	*	0.0787242	0.00373543
Bacteria	Patescibacteria	Parcubacteria	Candidatus Nomurabacteria			ASV_465	PP	2.67197	0.0237997	*	0.0943183	0.0192674
Bacteria	Planctomycetota	Phycisphaerae	Tepidisphaerales	CPla-3 termite group		ASV_964	PP	2.67135	0.0302664	*	0.0931789	0.0135526
Bacteria	Bacteroidota	Bacteroidia	Sphingobacteriales	Sphingobacteriaceae		ASV_666	PE	2.67107	0.0361675	*	0.0878659	0.00675292
Bacteria	Cyanobacteriota	Cyanobacteriia	Chloroplast			ASV_507	PE	2.66936	0.0476369	*	0.101276	0.00620074
Bacteria	Bacteroidota	Bacteroidia	Sphingobacteriales	Sphingobacteriaceae	Mucilaginibacter	ASV_958	Unmulched control	2.66643	0.0288583	*	0.090177	0.0143912
Bacteria	Planctomycetota	Phycisphaerae	Tepidisphaerales	WD2101 soil group		ASV_294	PE	2.65914	0.0247534	*	0.112969	0.0115146
Bacteria	Verrucomicrobiota	Verrucomicrobiia	Opitutales	Opitutaceae		ASV_783	PE	2.65524	0.0461772	*	0.0884127	0.00761411
Bacteria	Actinomycetota	Thermoleophilia	Gaiellales			ASV_1153	OxoPE	2.65321	0.035284	*	0.0445245	0.0222824
Bacteria	Armatimonadota	Chthonomonadia	Chthonomonadales	Chthonomonadaceae	Chthonomonas	ASV_848	PE	2.64296	0.0398084	*	0.0526706	0.00678965
Bacteria	Bacteroidota	Bacteroidia	Flavobacteriales	Flavobacteriaceae	Flavobacterium	ASV_866	PBAT	2.64261	0.0184326	*	0.0405834	0.00668393
Bacteria	Bacteroidota	Bacteroidia	Chitinophagales	37-13		ASV_540	Unmulched control	2.64208	0.0301038	*	0.0722884	0.0292446
Bacteria	Candidatus Eremiobacterota	Eremiobacteria				ASV_305	PE	2.64133	0.0204447	*	0.099013	0.0138277
Bacteria	Bacteroidota	Bacteroidia	Cytophagales	Microscillaceae		ASV_1860	PP	2.6398	0.00797675	**	0.0790473	0.0327043
Bacteria	Actinomycetota	Actinobacteria	Frankiales	Acidothermaceae	Acidothermus	ASV_472	PE	2.63819	0.025248	*	0.0824555	0.027511
Bacteria	Pseudomonadota	Gammaproteobacteria	Lysobacterales	Rhodanobacteraceae	Rhodanobacter	ASV_928	PBAT	2.63398	0.0337457	*	0.0626517	0.0131174
Bacteria	Bacteroidota	Bacteroidia	Sphingobacteriales	Sphingobacteriaceae	Pedobacter	ASV_1135	PBAT	2.62153	0.0274143	*	0.0525834	0.0046555
Bacteria	Pseudomonadota	Alphaproteobacteria	Hyphomicrobiales	Beijerinckiaceae	Roseiarcus	ASV_831	PE	2.62128	0.0261779	*	0.0789533	0.0139618
Bacteria	Pseudomonadota	Gammaproteobacteria	Burkholderiales	Burkholderiaceae		ASV_915	PE	2.61533	0.0154418	*	0.057293	0.0125074
Bacteria	Planctomycetota	Phycisphaerae	Tepidisphaerales	WD2101 soil group		ASV_278	OxoPE	2.60447	0.0382406	*	0.101612	0.00250365
Bacteria	Pseudomonadota	Alphaproteobacteria	Hyphomicrobiales	Rhizobiaceae		ASV_1296	PBAT	2.60239	0.00797675	**	0.0665077	0.011643
Bacteria	Planctomycetota	Phycisphaerae	Tepidisphaerales	WD2101 soil group		ASV_800	PE	2.60184	0.0184326	*	0.072757	0.00663358
Bacteria	Verrucomicrobiota	Verrucomicrobiia	Opitutales	Opitutaceae		ASV_1485	PE	2.60049	0.00797675	**	0.0758285	0.0133357
Bacteria	Pseudomonadota	Alphaproteobacteria	Holosporales	Holosporaceae		ASV_1128	OxoPE	2.59455	0.0310146	*	0.0684054	0.0274353
Bacteria	Pseudomonadota	Alphaproteobacteria	Defluviicoccales	Defluviicoccaceae	Defluviicoccus	ASV_925	Unmulched control	2.59238	0.0207615	*	0.0450048	0.00252451
Bacteria	Bacteroidota	Bacteroidia	Flavobacteriales	Flavobacteriaceae	Flavobacterium	ASV_1204	Unmulched control	2.59193	0.0184326	*	0.0619435	0.0143848
Bacteria	Bacteroidota	Bacteroidia	Sphingobacteriales	env.OPS 17		ASV_1209	PP	2.59109	0.0212037	*	0.0718672	0.0134201
Bacteria	Bacteroidota	Bacteroidia	Sphingobacteriales	Sphingobacteriaceae	Mucilaginibacter	ASV_1634	Unmulched control	2.58948	0.0337457	*	0.0696512	0.020977
Bacteria	Bacteroidota	Bacteroidia	Chitinophagales			ASV_593	PE	2.58638	0.015115	*	0.0845165	0.00706538
Bacteria	Patescibacteria	Parcubacteria				ASV_1152	PE	2.58582	0.0249485	*	0.067271	0.00466878
Bacteria	Bdellovibrionota	Oligoflexia	Silvanigrellales	Silvanigrellaceae		ASV_287	PP	2.58238	0.0409412	*	0.0250264	0.0077218
Bacteria	Pseudomonadota	Alphaproteobacteria	Rickettsiales	SM2D12		ASV_740	PE	2.58022	0.0168802	*	0.0591564	0.0085598
Bacteria	Pseudomonadota	Alphaproteobacteria	Acetobacterales	Acetobacteraceae	Acidocella	ASV_1133	PP	2.57957	0.0184326	*	0.0566276	0.00393748
Bacteria	Myxococcota	Polyangiia	Haliangiales	Haliangiaceae		ASV_2090	PP	2.57925	0.00797675	**	0.0352829	0.00237014
Bacteria	Patescibacteria	Saccharimonadia	Saccharimonadales	LWQ8		ASV_1395	PE	2.57601	0.0184326	*	0.0594626	0.000956623
Bacteria	Pseudomonadota	Alphaproteobacteria	Acetobacterales	Acetobacteraceae		ASV_611	PE	2.57359	0.0362798	*	0.0593092	0.0137652
Bacteria	Bacteroidota	Bacteroidia	Chitinophagales	Chitinophagaceae	Ferruginibacter	ASV_1143	PP	2.57128	0.0481006	*	0.0679807	0.0218755
Bacteria	Pseudomonadota	Gammaproteobacteria	Burkholderiales	Gallionellaceae		ASV_1916	PP	2.56305	0.0164701	*	0.044406	0.00253419
Bacteria	Pseudomonadota	Alphaproteobacteria	Elsterales			ASV_426	PE	2.55459	0.0459423	*	0.0899973	0.0188655
Bacteria	Chlamydiota	Chlamydiia	Chlamydiales	Simkaniaceae		ASV_948	PP	2.55262	0.0497016	*	0.0670576	0.0254277
Bacteria	Bdellovibrionota	Oligoflexia	0319-6G20			ASV_714	PE	2.54795	0.0195719	*	0.0637795	0.00544293
Bacteria	Verrucomicrobiota	Verrucomicrobiia	Opitutales	Opitutaceae		ASV_1351	PBAT	2.54305	0.0274143	*	0.0548032	0.00822291
Bacteria	Patescibacteria	Saccharimonadia	Saccharimonadales			ASV_2282	Unmulched control	2.53595	0.00797675	**	0.0528799	0.0125834
Bacteria	Verrucomicrobiota	Verrucomicrobiia	Opitutales	Opitutaceae		ASV_1330	PE	2.53504	0.0274143	*	0.0665493	0.019516
Bacteria	Myxococcota	Polyangiia	Polyangiales	Polyangiaceae	Minicystis	ASV_2121	PE	2.53423	0.00797675	**	0.0571892	0.00670158
Bacteria	Bacteroidota	Bacteroidia	Sphingobacteriales	CWT CU03-E12		ASV_1850	PE	2.53135	0.0184326	*	0.0446324	0.0025748
Bacteria	Patescibacteria	Parcubacteria				ASV_1959	PE	2.52138	0.0212037	*	0.0257749	0.00950972
Bacteria	Pseudomonadota	Alphaproteobacteria	Hyphomicrobiales	Xanthobacteraceae	Pseudolabrys	ASV_770	PP	2.52001	0.0244059	*	0.0669706	0.00928521
Bacteria	Pseudomonadota	Alphaproteobacteria	Acetobacterales	Acetobacteraceae		ASV_283	PP	2.50859	0.0409152	*	0.0702042	0.00870425
Bacteria	Patescibacteria	Saccharimonadia	Saccharimonadales	Saccharimonadaceae	TM7a	ASV_3029	Unmulched control	2.50761	0.0387447	*	0.026319	0.00697791
Bacteria	Bacteroidota	Bacteroidia	Chitinophagales	Chitinophagaceae	Heliimonas	ASV_1423	PE	2.50599	0.0274143	*	0.0530257	0.00416681
Bacteria	Bacteroidota	Bacteroidia	Cytophagales	Cytophagaceae	Sporocytophaga	ASV_1382	PBAT	2.49813	0.0387447	*	0.0245909	0.0137196
Bacteria	Bacteroidota	Bacteroidia	Cytophagales	Cytophagaceae	Cytophaga	ASV_38	PP	2.49608	0.0414912	*	0.0869555	0.0204572
Bacteria	Spirochaetota	Spirochaetia	Spirochaetales	Spirochaetaceae	Spirochaeta 2	ASV_1755	PE	2.4953	0.00797675	**	0.0544462	0.00632552
Bacteria	Patescibacteria	Parcubacteria	Candidatus Adlerbacteria			ASV_2148	PE	2.49291	0.0337457	*	0.046676	0.00335835
Bacteria	Planctomycetota	Planctomycetes	Gemmatales	Gemmataceae	Zavarzinella	ASV_720	OxoPE	2.48561	0.0478791	*	0.0485245	0.0182869
Bacteria	Pseudomonadota	Gammaproteobacteria	Burkholderiales	Burkholderiaceae	Burkholderia-Caballeronia-Paraburkholderia	ASV_914	OxoPE	2.48441	0.0387447	*	0.040563	0.0148847
Bacteria	Planctomycetota	Phycisphaerae	Tepidisphaerales	WD2101 soil group		ASV_1067	PE	2.48341	0.0337457	*	0.050004	0.0047957
Bacteria	Chloroflexota	Ktedonobacteria	Ktedonobacterales	Ktedonobacteraceae		ASV_2080	PE	2.45774	0.0184326	*	0.0515879	0.0205652
Bacteria	Pseudomonadota	Alphaproteobacteria	Hyphomicrobiales	Beijerinckiaceae	Roseiarcus	ASV_742	OxoPE	2.44077	0.0291783	*	0.05219	0.0116784
Bacteria	Dependentiae	Babeliae	Babeliales			ASV_3127	PE	2.42549	0.0261779	*	0.0162017	0.00228787
Bacteria	Patescibacteria	Parcubacteria	Candidatus Kaiserbacteria			ASV_2515	PBAT	2.42394	0.0274143	*	0.0211819	0.00583118
Bacteria	Bacteroidota	Bacteroidia	Chitinophagales	Chitinophagaceae	Ferruginibacter	ASV_1206	PP	2.4105	0.0412616	*	0.0459609	0.00965968
Bacteria	Verrucomicrobiota	Verrucomicrobiia	Opitutales	Opitutaceae		ASV_2176	PE	2.41004	0.00797675	**	0.0423209	0.00527494
Bacteria	Pseudomonadota	Alphaproteobacteria				ASV_805	OxoPE	2.40791	0.0478791	*	0.0319914	0.00917242
Bacteria	Bacteroidota	Bacteroidia	Sphingobacteriales	Sphingobacteriaceae	Mucilaginibacter	ASV_2022	PE	2.39831	0.00945306	**	0.03813	0.00493515
Bacteria	Pseudomonadota	Gammaproteobacteria	Burkholderiales	Comamonadaceae	Roseateles	ASV_2177	PP	2.39115	0.0274143	*	0.0350078	0.00595277
Bacteria	Pseudomonadota	Alphaproteobacteria				ASV_1327	PP	2.36317	0.0288583	*	0.0373778	0.0102699
Bacteria	Bacteroidota	Bacteroidia	Chitinophagales			ASV_1172	PE	2.30042	0.0479725	*	0.0373319	0.0103025
Bacteria	Verrucomicrobiota	Verrucomicrobiia	Verrucomicrobiales	Verrucomicrobiaceae		ASV_2113	PP	2.29912	0.0387447	*	0.0327946	0.00860067
Bacteria	Bacteroidota	Bacteroidia	Sphingobacteriales	Sphingobacteriaceae	Mucilaginibacter	ASV_2957	PE	2.0763	0.0387447	*	0.00987936	0.00535553
